# Supplementary material for: CSF cytokine profile in MOG-IgG+ neurological disease is similar to AQP4-IgG+ NMOSD but distinct from MS: a cross-sectional study and potential therapeutic implications
Source: PubMed Central journal article supplement — J Neurol Neurosurg Psychiatry. 2018 Jun 6;89(9):927–36. doi: 10.1136/jnnp-2018-317969 (PMC6109242; doi:10.1136/jnnp-2018-317969), 2018-06-06
Supplement: jnnp-2018-317969supp004.pdf [file jnnp-2018-317969supp004.pdf]

Supplementary e-Table2

Correlations between three Th17 cytokines(IL-6, IL-8, G-CSF) and CSF and serum data in AQP4-IgG+NMOSD and MOG-IgG+disease.

|           |       | CSF cell count                | MBP                          | GFAP                          | Serum antibody titer        | CSF antibody titer           |
|-----------|-------|-------------------------------|------------------------------|-------------------------------|-----------------------------|------------------------------|
| AQP4-IgG+ | IL-6  | 0.47*<br>( <i>p</i> =0.037)   | 0.67*<br>( <i>p</i> =0.0013) | 0.81*<br>( <i>p</i> <0.0001)  | 0.51*<br>( <i>p</i> =0.022) | 0.77*<br>( <i>p</i> <0.0001) |
|           | IL-8  | 0.33<br>( <i>p</i> =0.15)     | 0.32<br>( <i>p</i> =0.16)    | 0.34<br>( <i>p</i> =0.14)     | 0.22<br>( <i>p</i> =0.36)   | 0.54*<br>( <i>p</i> =0.014)  |
|           | G-CSF | 0.72*<br>( <i>p</i> =0.00035) | 0.504*<br>( <i>p</i> =0.023) | 0.704*<br>( <i>p</i> <0.0001) | 0.47*<br>( <i>p</i> =0.035) | 0.65*<br>( <i>p</i> =0.0021) |
| MOG-IgG+  | IL-6  | 0.28<br>( <i>p</i> =0.15)     | 0.27<br>( <i>p</i> =0.15)    | -0.26<br>( <i>p</i> =0.18)    | 0.28<br>( <i>p</i> =0.14)   | 0.51*<br>( <i>p</i> =0.0051) |
|           | IL-8  | 0.35*<br>( <i>p</i> =0.060)   | 0.36<br>( <i>p</i> =0.053)   | -0.12<br>( <i>p</i> =0.53)    | 0.49*<br>( <i>p</i> =0.013) | 0.46*<br>( <i>p</i> =0.0007) |
|           | G-CSF | 0.35*<br>( <i>p</i> =0.060)   | 0.15<br>( <i>p</i> =0.44)    | -0.28<br>( <i>p</i> =0.14)    | 0.4*<br>( <i>p</i> =0.030)  | 0.53*<br>( <i>p</i> =0.0031) |

Abbreviations: Th=T helper cell; IL=interleukin; G-CSF; granulocyte colony stimulating factor; CSF=cerebrospinal fluid; AQP4=aquaporin4; NMOSD=neuromyelitis optica; MOG=myelin oligodendrocyte glycoprotein; MBP=myelin basic protein; GFAP=glial fibrillary acidic protein. Data are coefficient R and p values in Spearman's rank correlation. "\*" means significant correlation (*p*<0.05)
